# Supplementary material for: Impact of fire on active layer and permafrost microbial communities and metagenomes in an upland Alaskan boreal forest
Source: PubMed Central journal article supplement — ISME J. 2014 Apr 10;8(9):1904–19. doi: 10.1038/ismej.2014.36 (PMC4139727; doi:10.1038/ismej.2014.36), 2014-04-10

## Supplementary Figure Legends

**Figure S1.** A) Proportion of different functional C-groups of soil organic matter in one control and two burn locations. Error bars indicate the standard error of mean. B) Indices of the decomposition and structural modification of organic material.

**Figure S2.** A) CO<sub>2</sub>, B) CH<sub>4</sub> and C) N<sub>2</sub>O fluxes measured in the headspace of eight week long anaerobic incubation of samples from control and burned locations. Samples were incubated at 20°C. Values are means ± standard error

**Figure S3.** Changes in the potential extracellular enzyme activities (nmol/gr soil /hr) between control and burned locations; BG, β-glucosidase; CBH,β-cellobiohydrolase; XYL, β-xylosidase;NAG, N-acetyl glucosaminidase

**Figure S4.** Rarefaction curves compiled using observed species counts.

**Figure S5.** A) Alpha diversity metrics calculated in each depth of control (blue) and burned (red) locations. No significant fire effect was found. B) Alpha diversity metrics changed significantly between different soil depths in control and burned locations.

**Figure S6.** Distribution of metagenomic reads between different microbial domains in different depths of control and burned locations.

**Figure S7.** Relative abundance of C-cycle genes in replicate metagenomes from surface (S), middle (M) and permafrost/deep (D) soils of control and burned locations. Standard deviations are calculated from two replicate metagenome per depth and condition.

**Figure S8.** α- and β-glucosidase; β-cellobiohydrolase, β-xylosidase coding genes in the metagenomes. Standard deviations are calculated from two replicate metagenome per depth and condition.

**Figure S9.** Changes in the relative gene abundances of methane production and oxidation genes in Nome Creek metagenomes. Replicate metagenomes are plotted individually. HS–CoM, Mercaptoethanesulfonate

**Figure S10.** Changes in the relative gene abundances of N-cycling genes in Nome Creek metagenomes. Replicate metagenomes are plotted individually.

**Figure S11.** Relative abundance of genes involved in Sulfur reduction in replicate metagenomes from surface (S), middle (M) and permafrost/deep (D) soils of control and burned locations. Standard deviations are calculated from two replicate metagenomes per depth and condition.

**Figure S12.** Relative abundance of genes involved in stress responses in replicate metagenomes from surface (S), middle (M) and permafrost/deep (D) soils of control and burned locations. Standard deviations are calculated from two replicate metagenomes per depth and condition.

Figure S1a

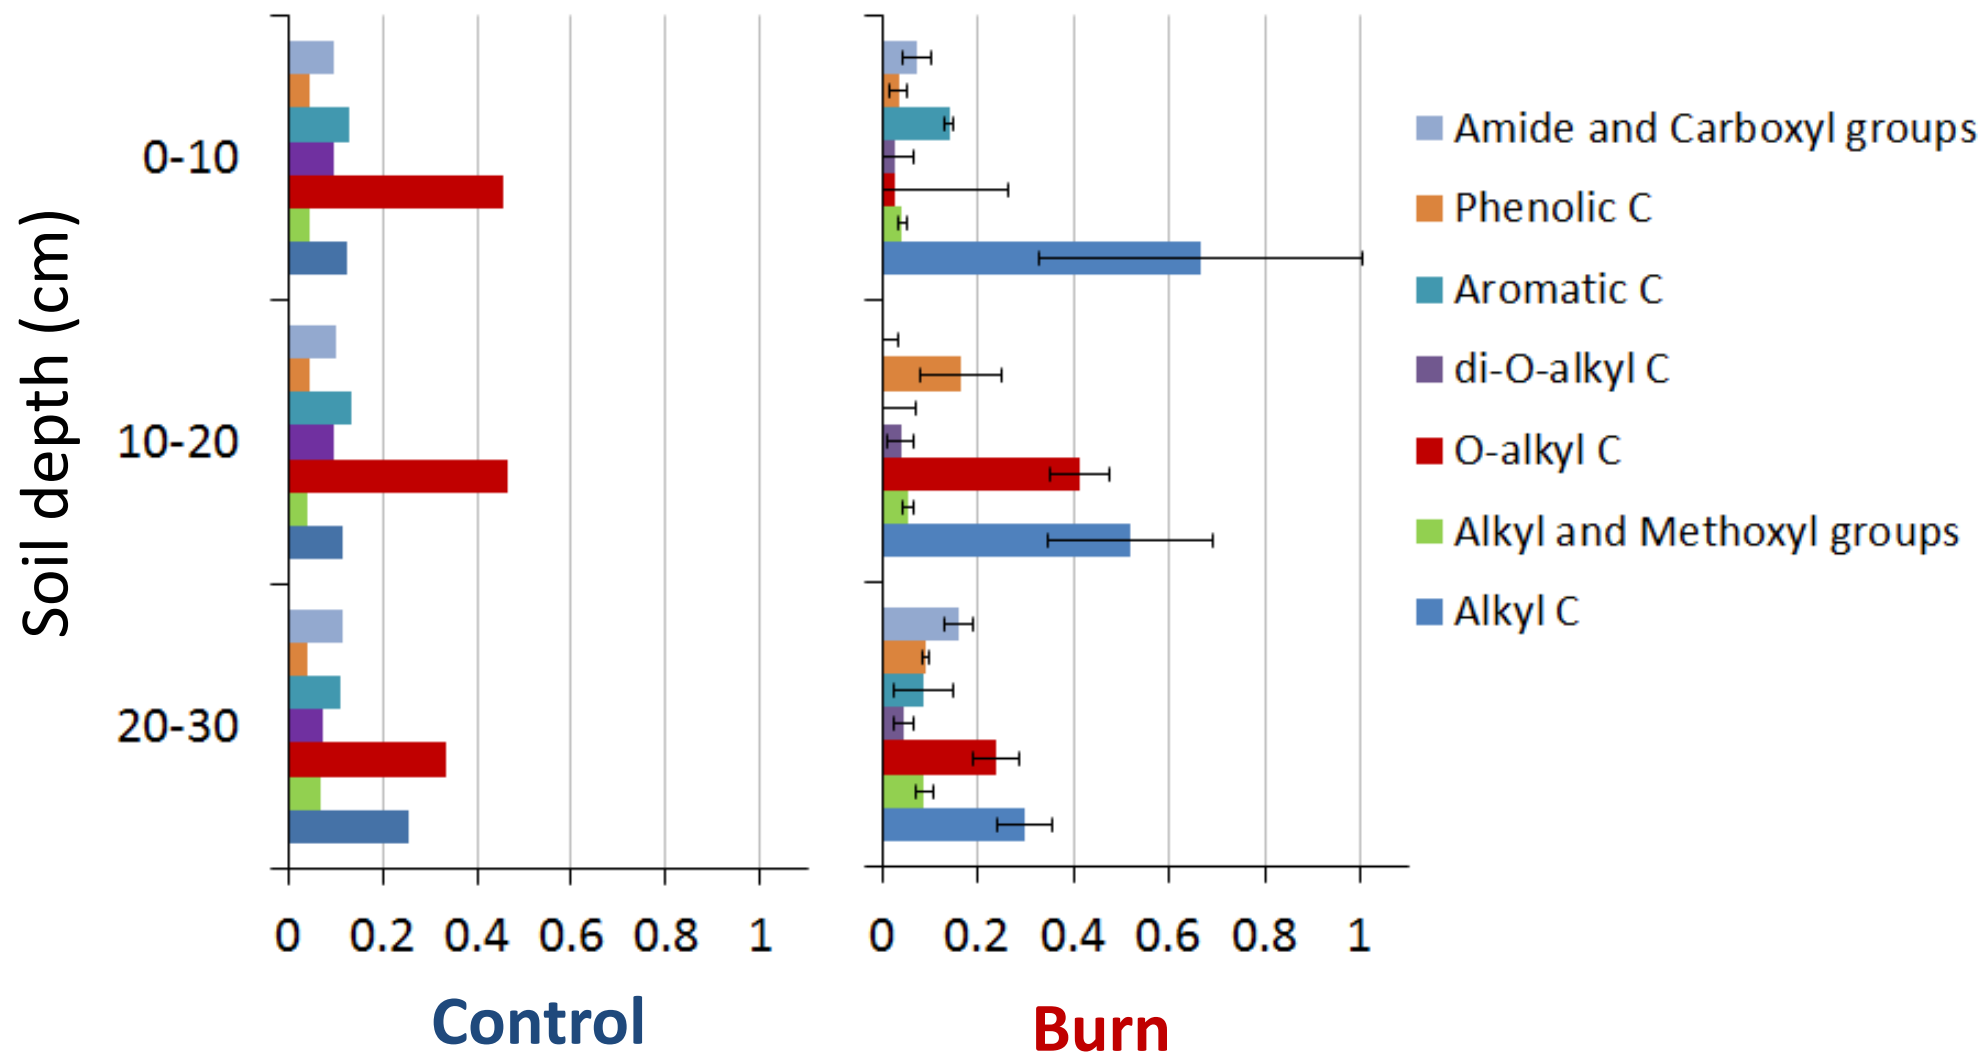

Figure S1b

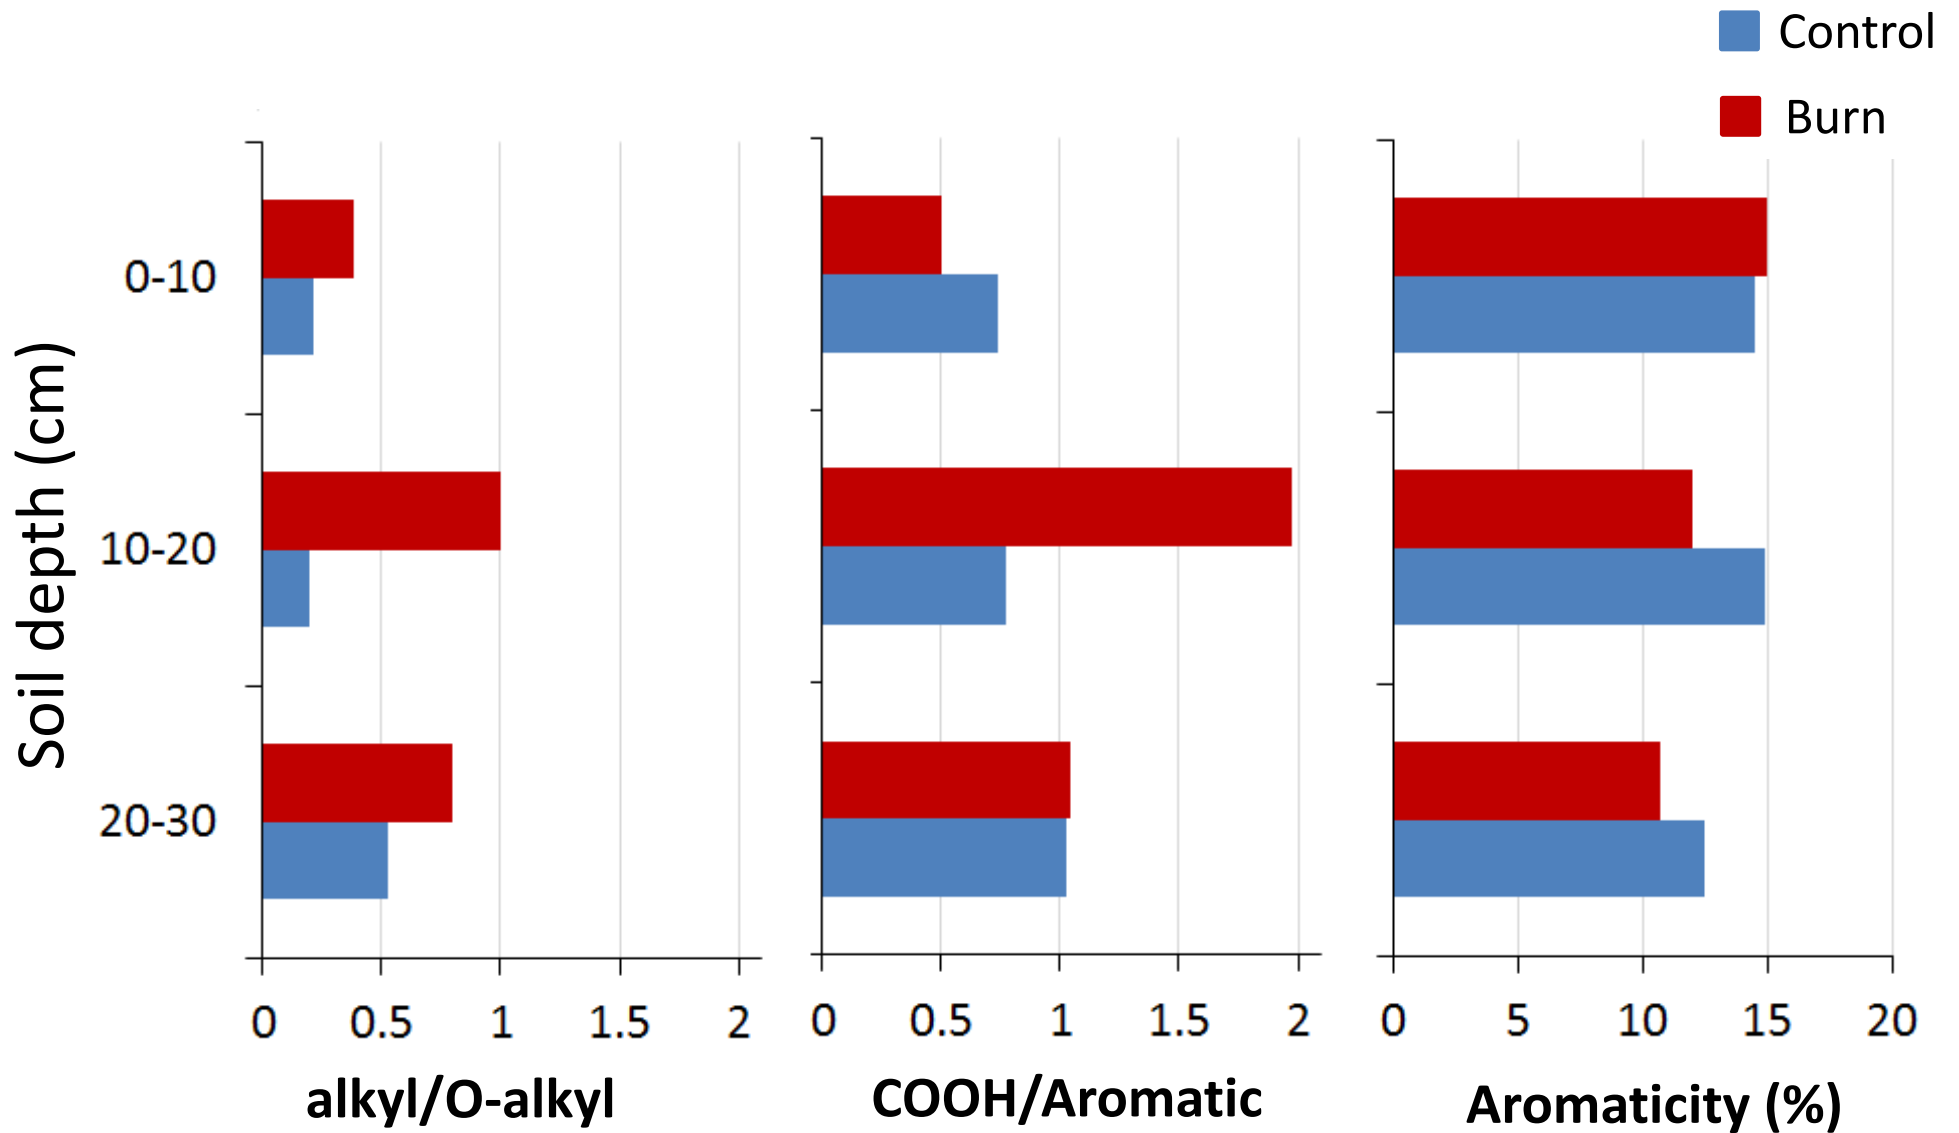

Figure S2

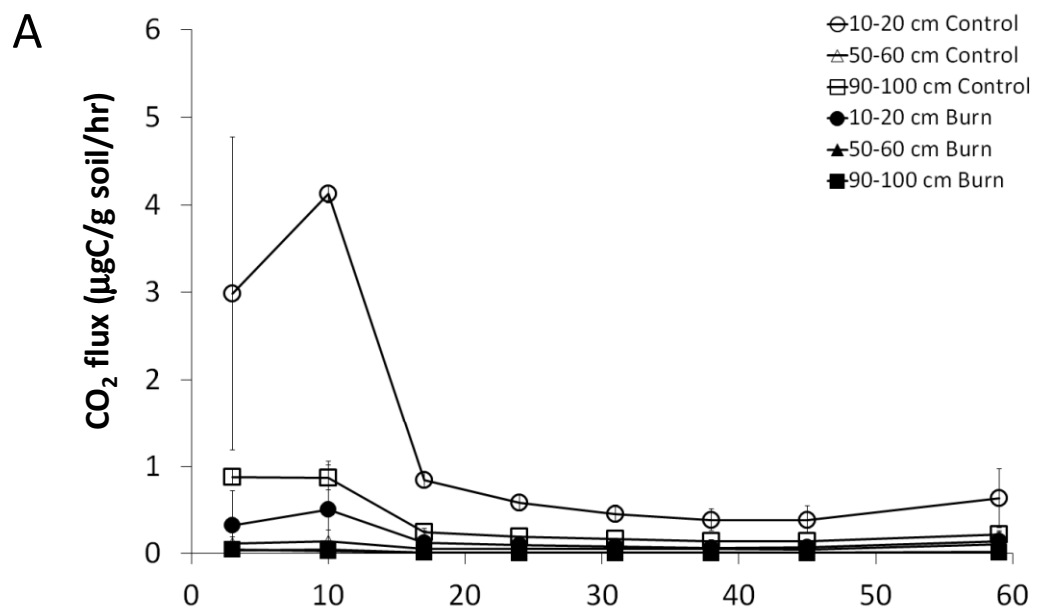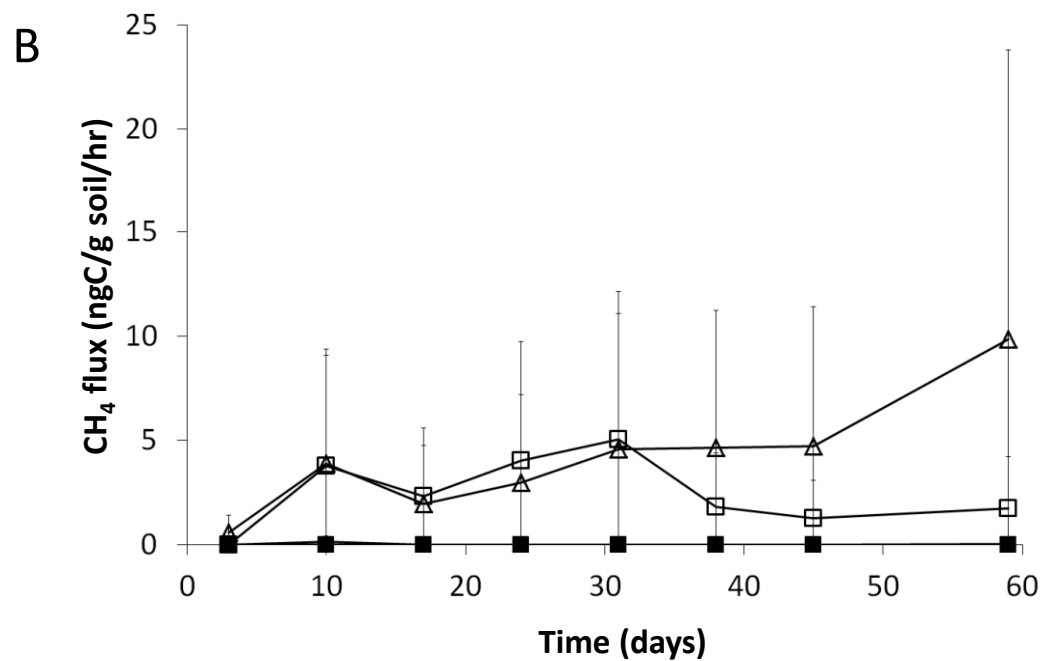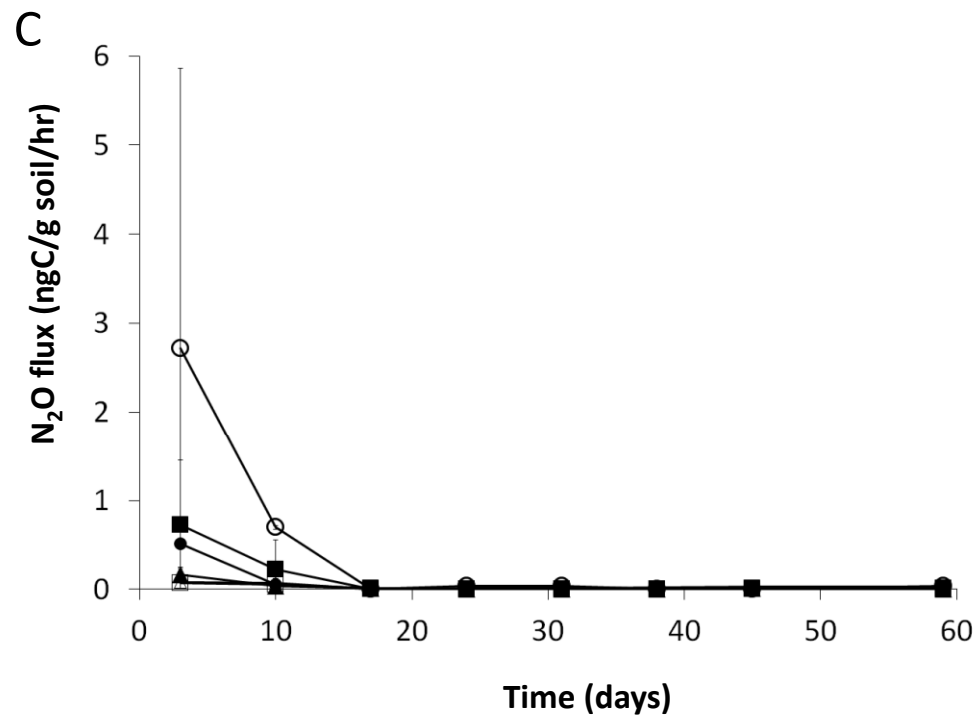



Figure S4

## Control

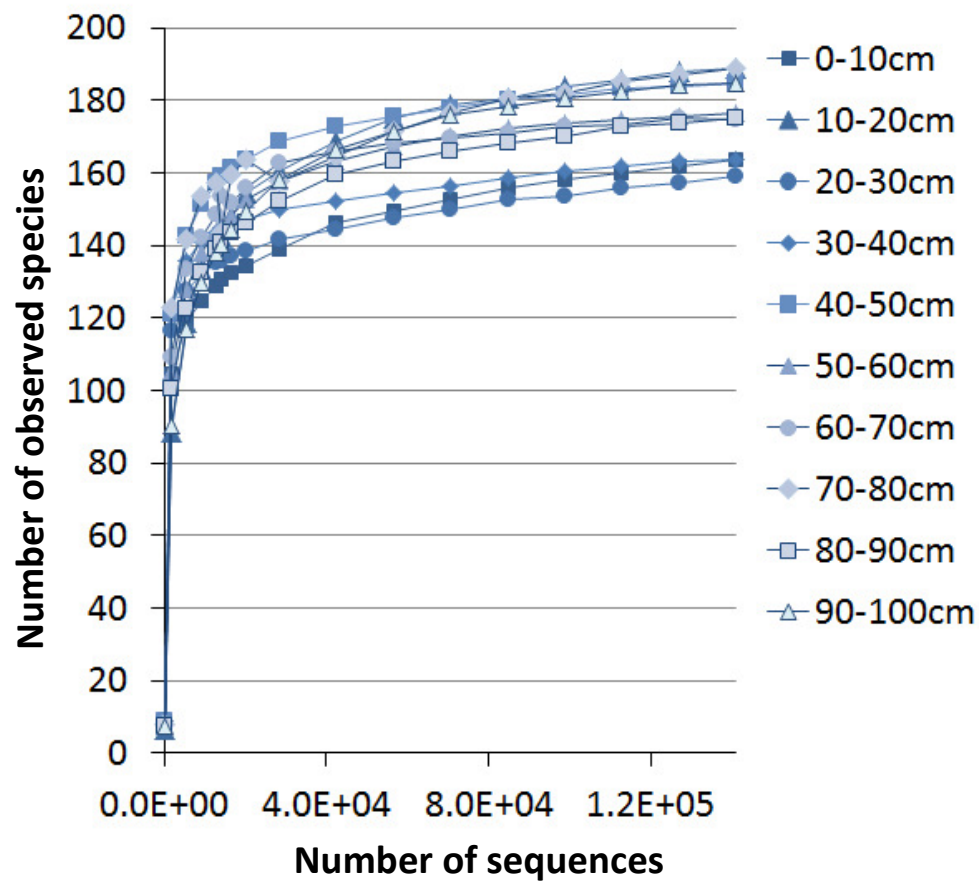

## Burn

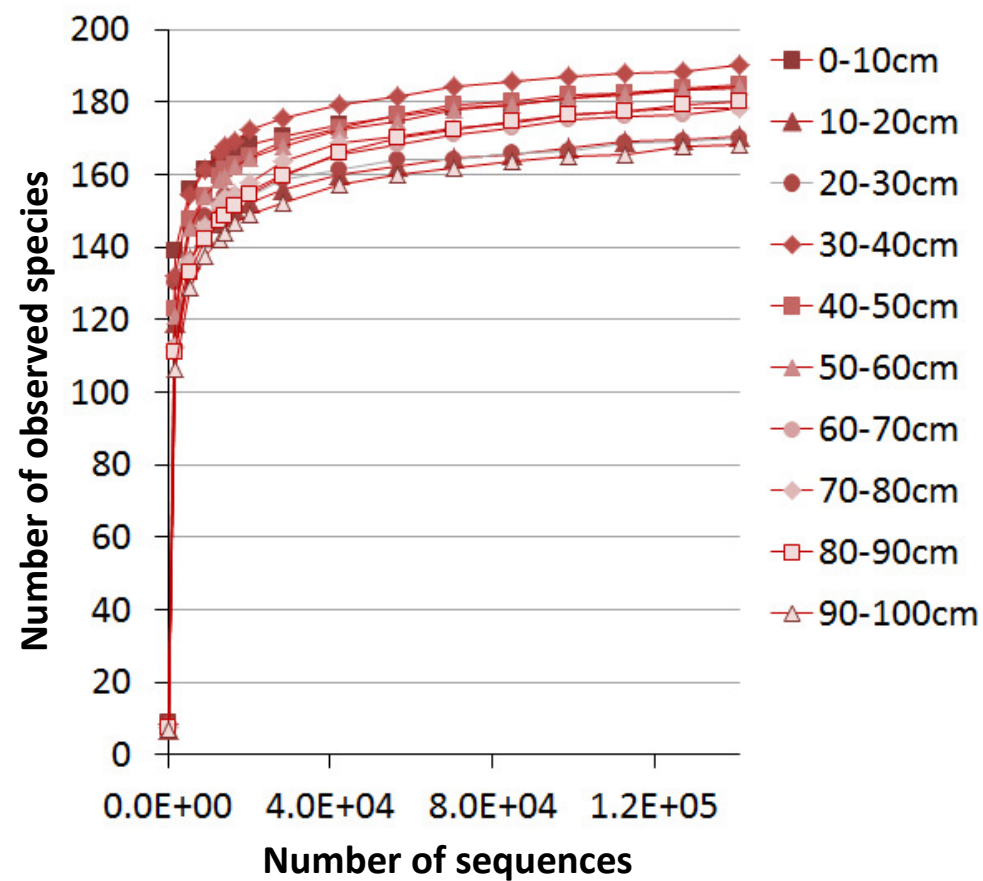

Figure S5

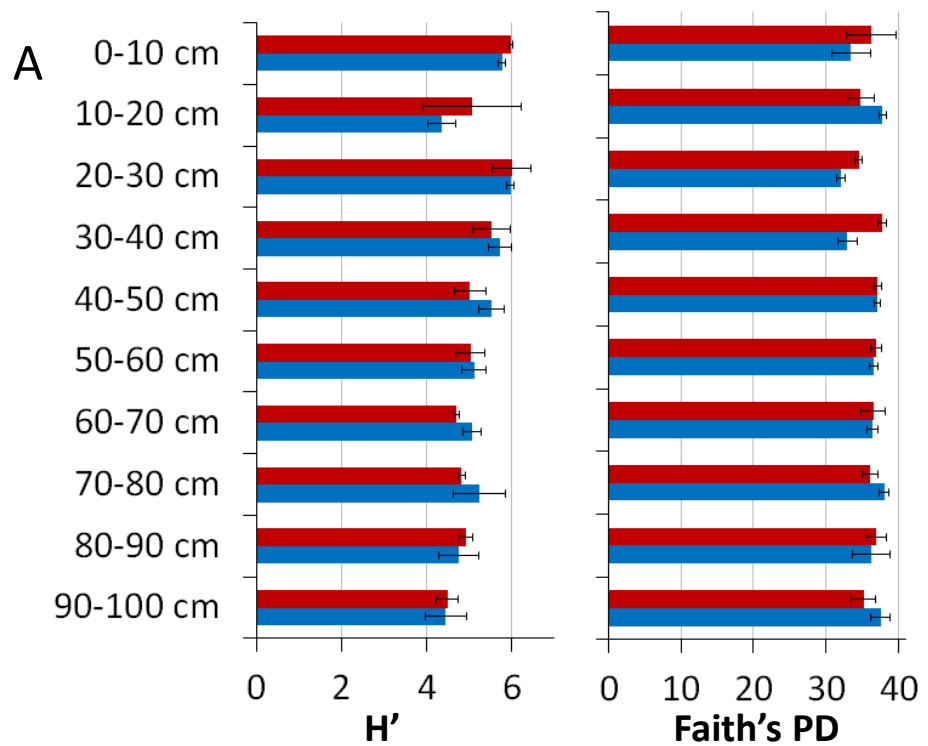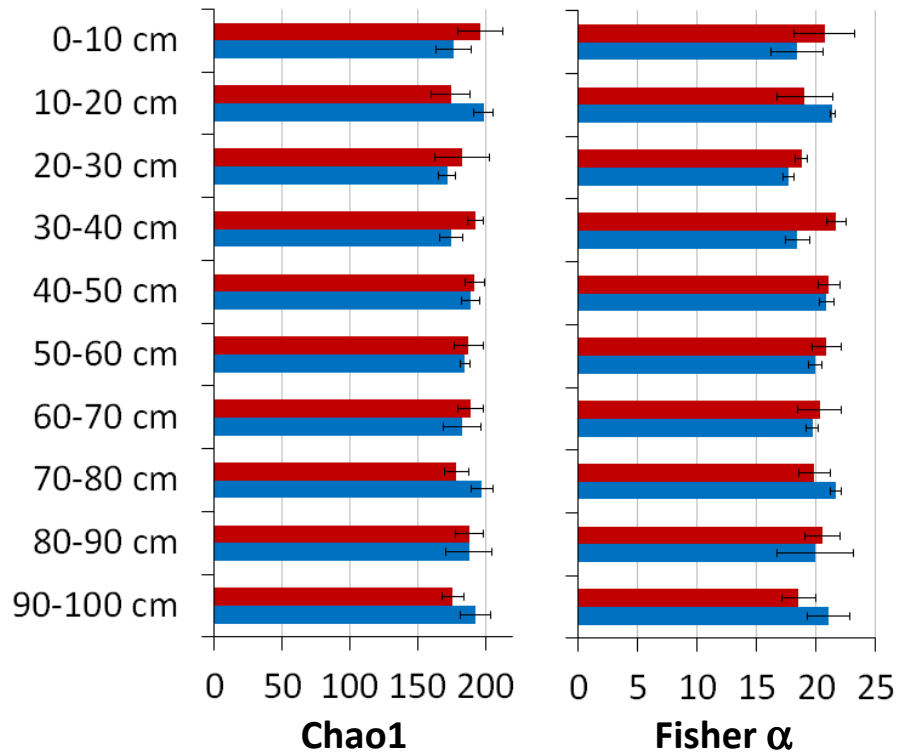

**B**

|                | Index            | F Model | p      |
|----------------|------------------|---------|--------|
| <b>Control</b> | Shannon H'       | 16.05   | <0.001 |
|                | Faith's PD       | 12.07   | <0.001 |
|                | Chao1            | 4.16    | <0.001 |
|                | Fishers $\alpha$ | 4.30    | <0.001 |
| <b>Burn</b>    | Shannon H'       | 4.70    | <0.001 |
|                | Faith's PD       | 1.60    | 0.163  |
|                | Chao1            | 1.65    | 0.148  |
|                | Fishers $\alpha$ | 1.66    | 0.145  |

■ Burn  
■ Control

Figure S6

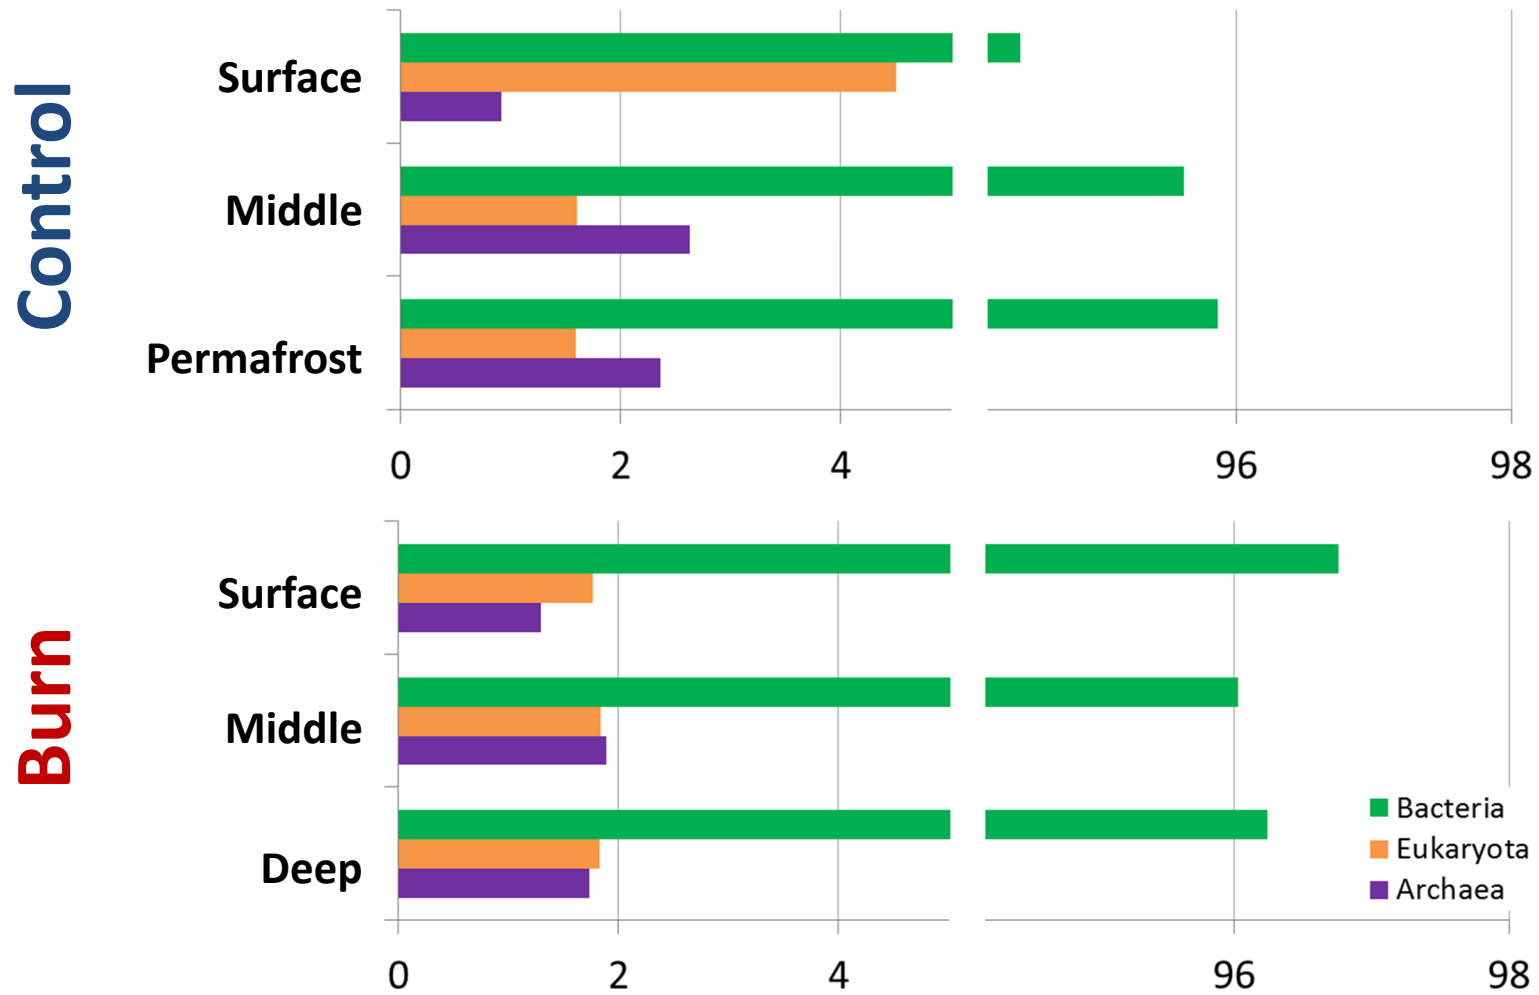

% distribution of gene annotations among different microbial domains



Figure S7

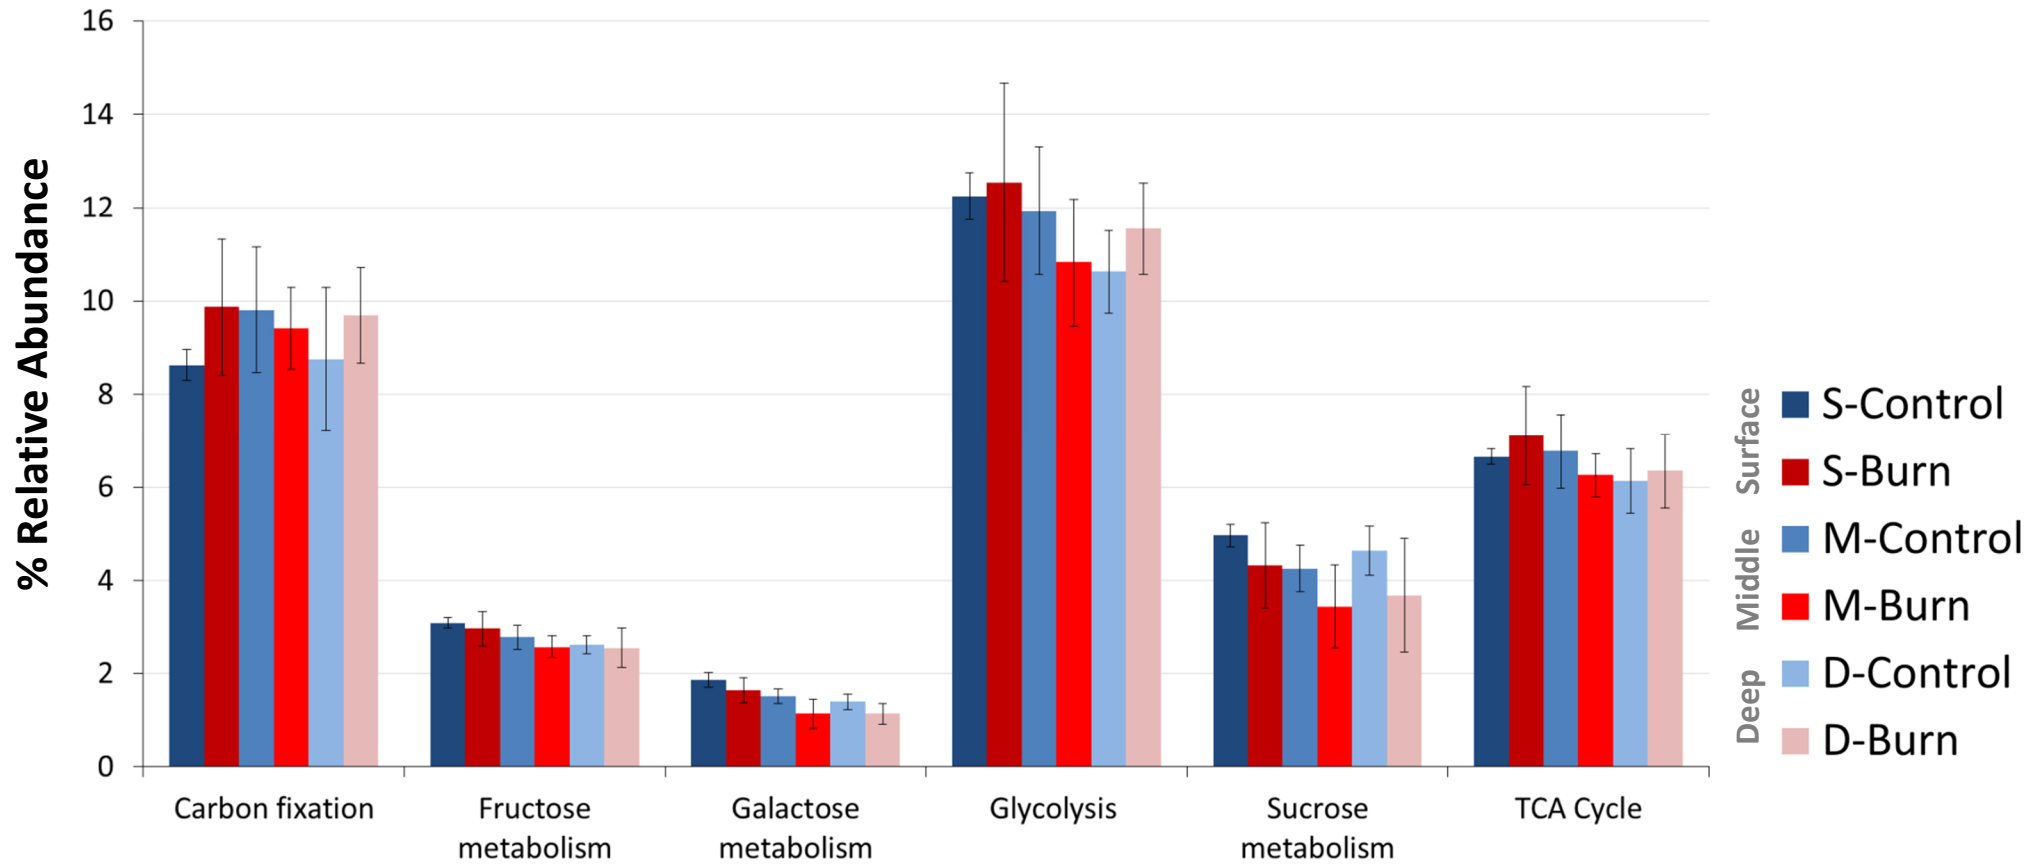

Figure S8

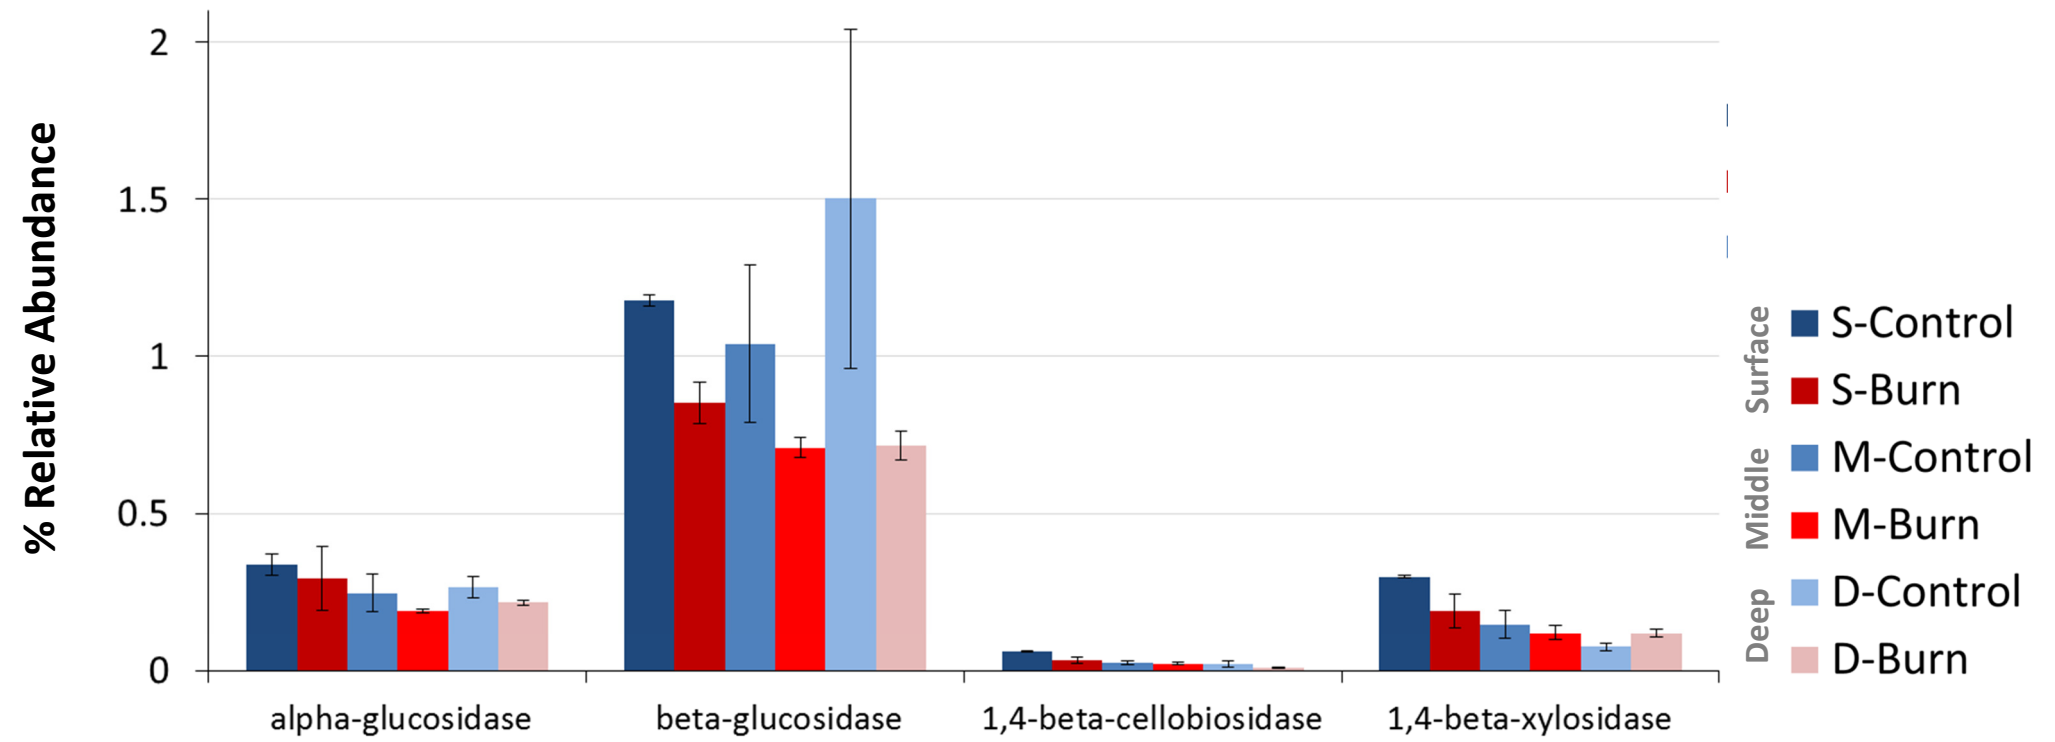

Figure S9

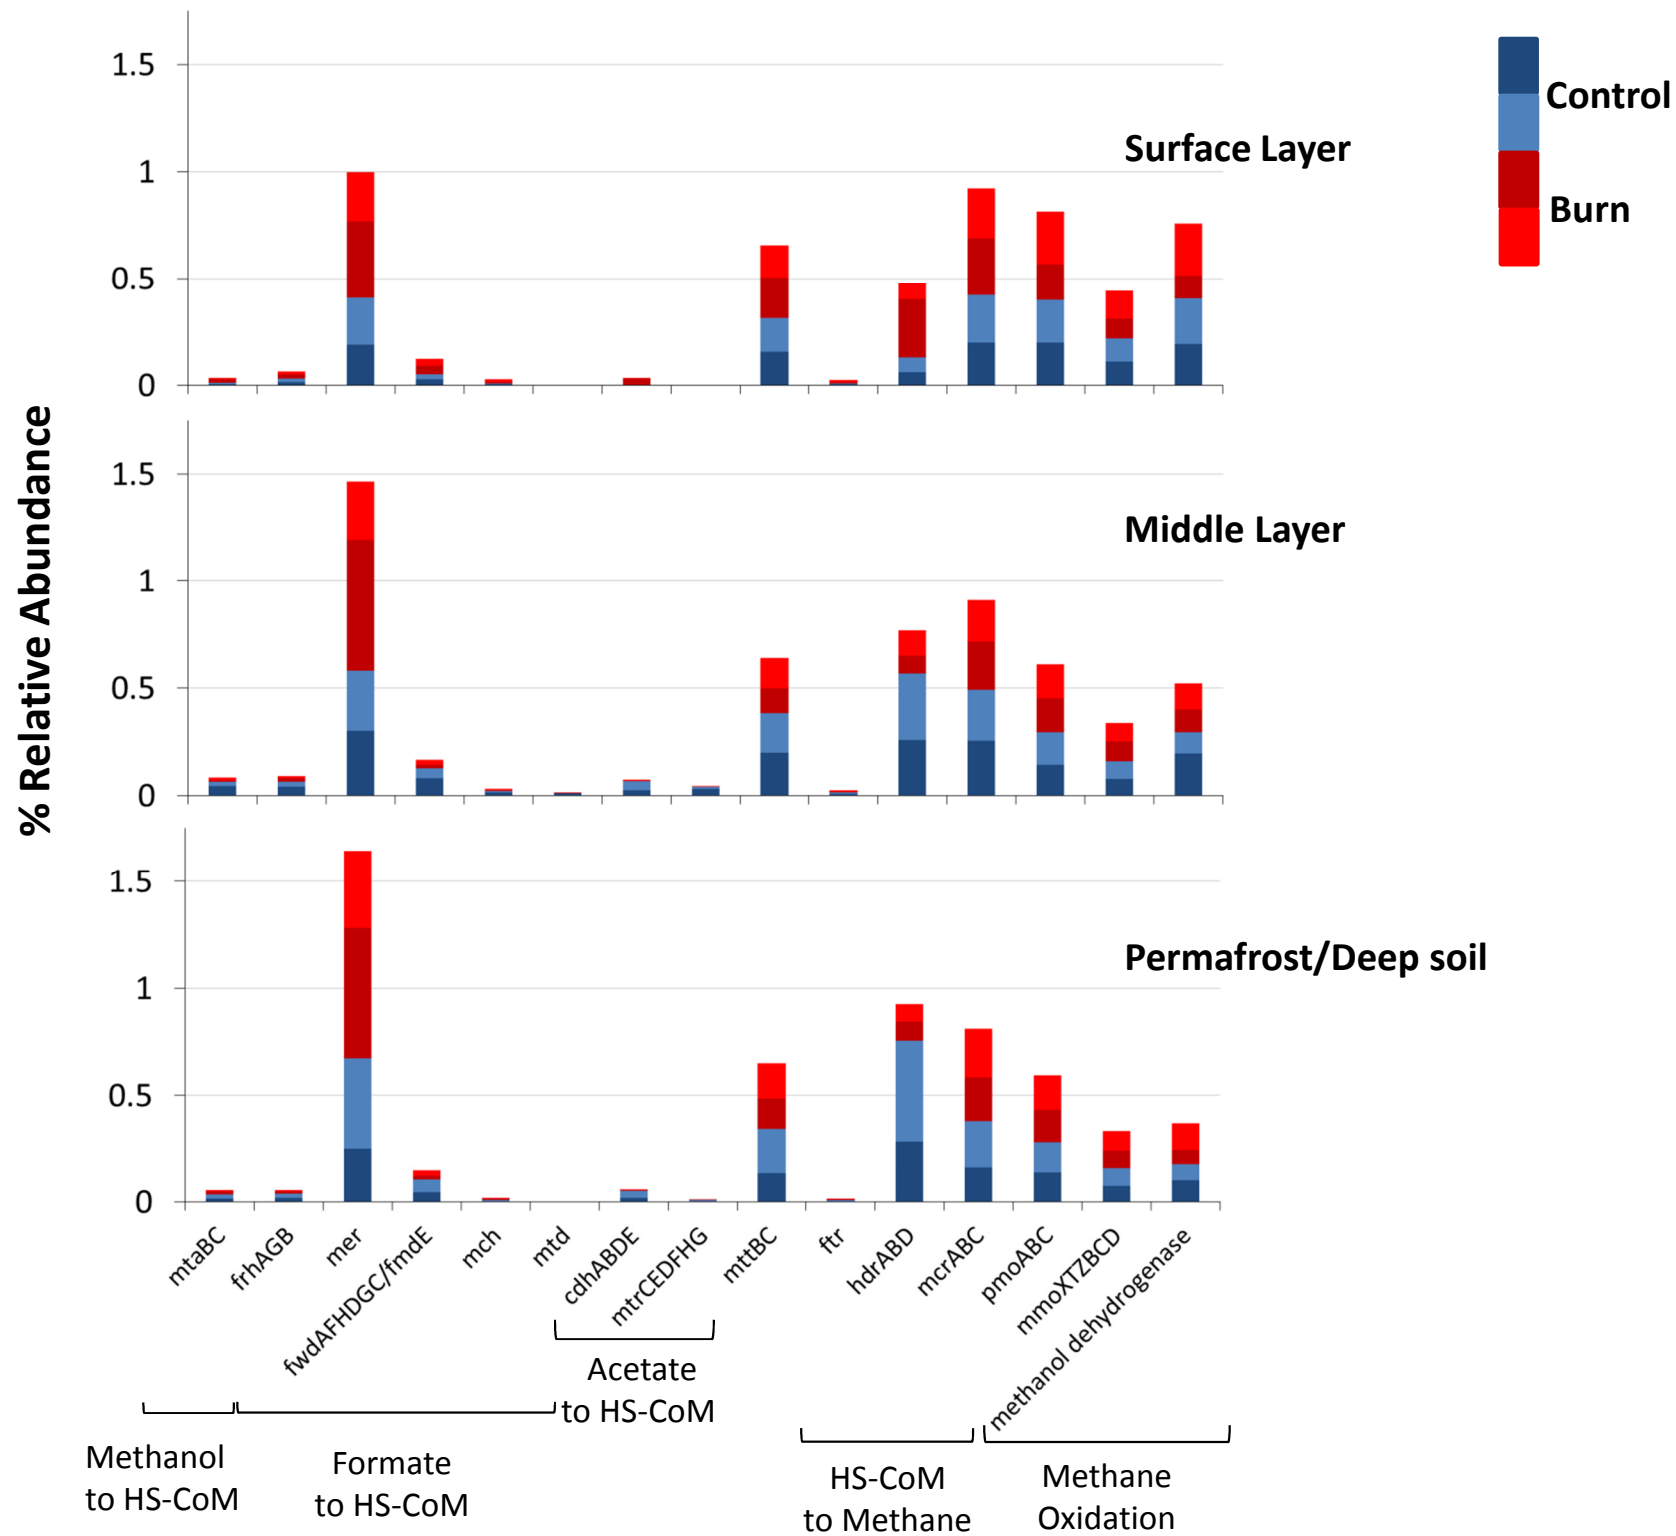

Figure S10

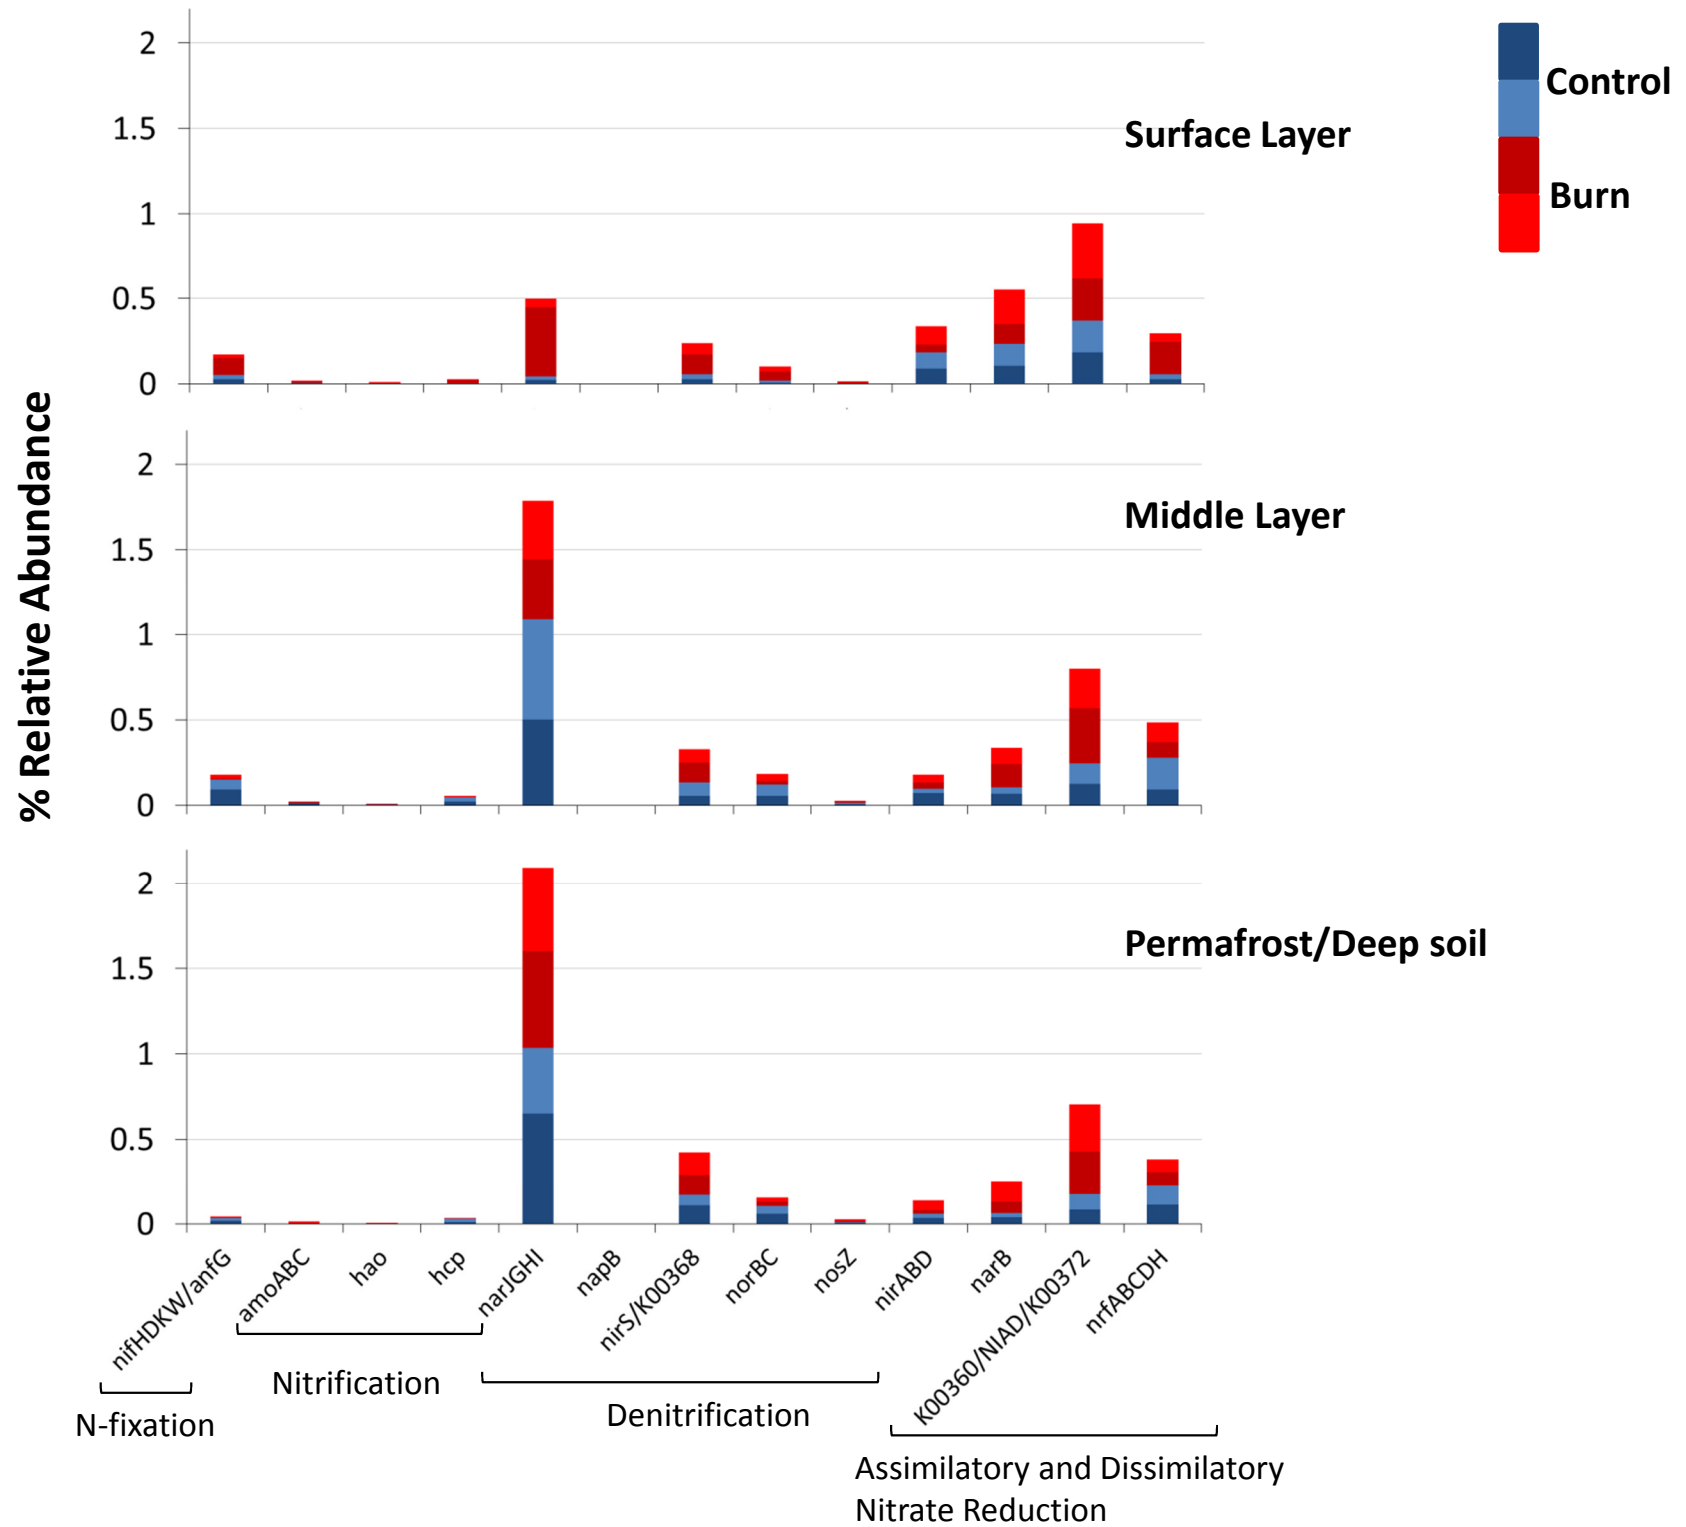

Figure S11

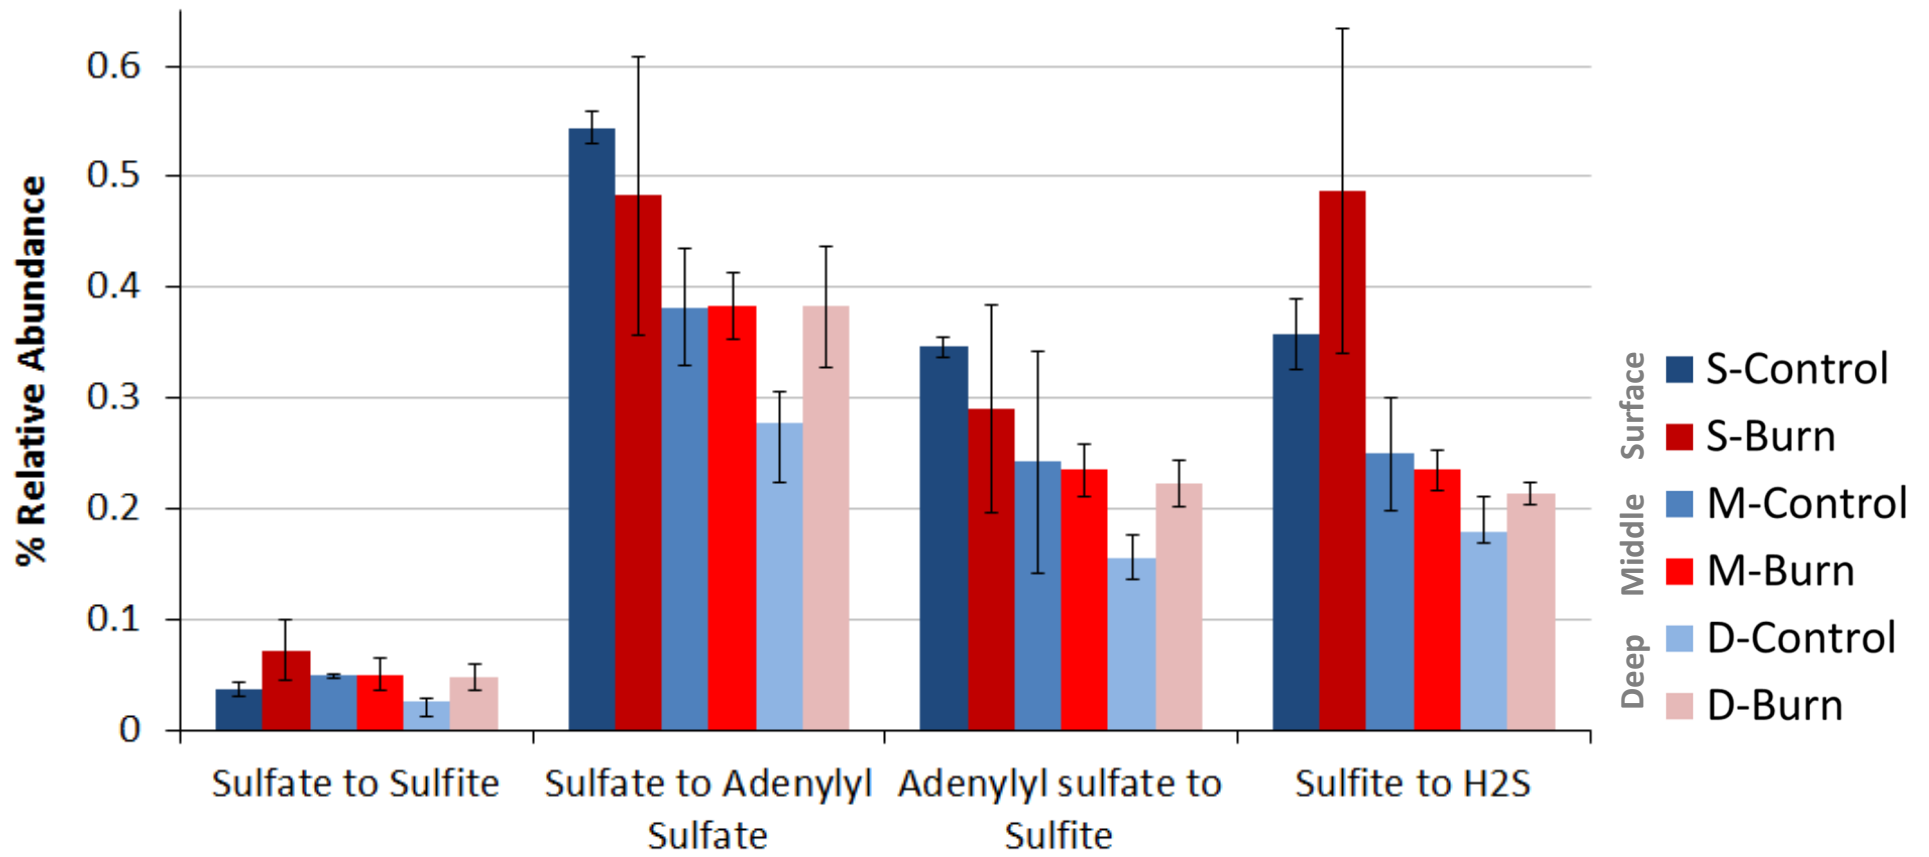

Figure S12

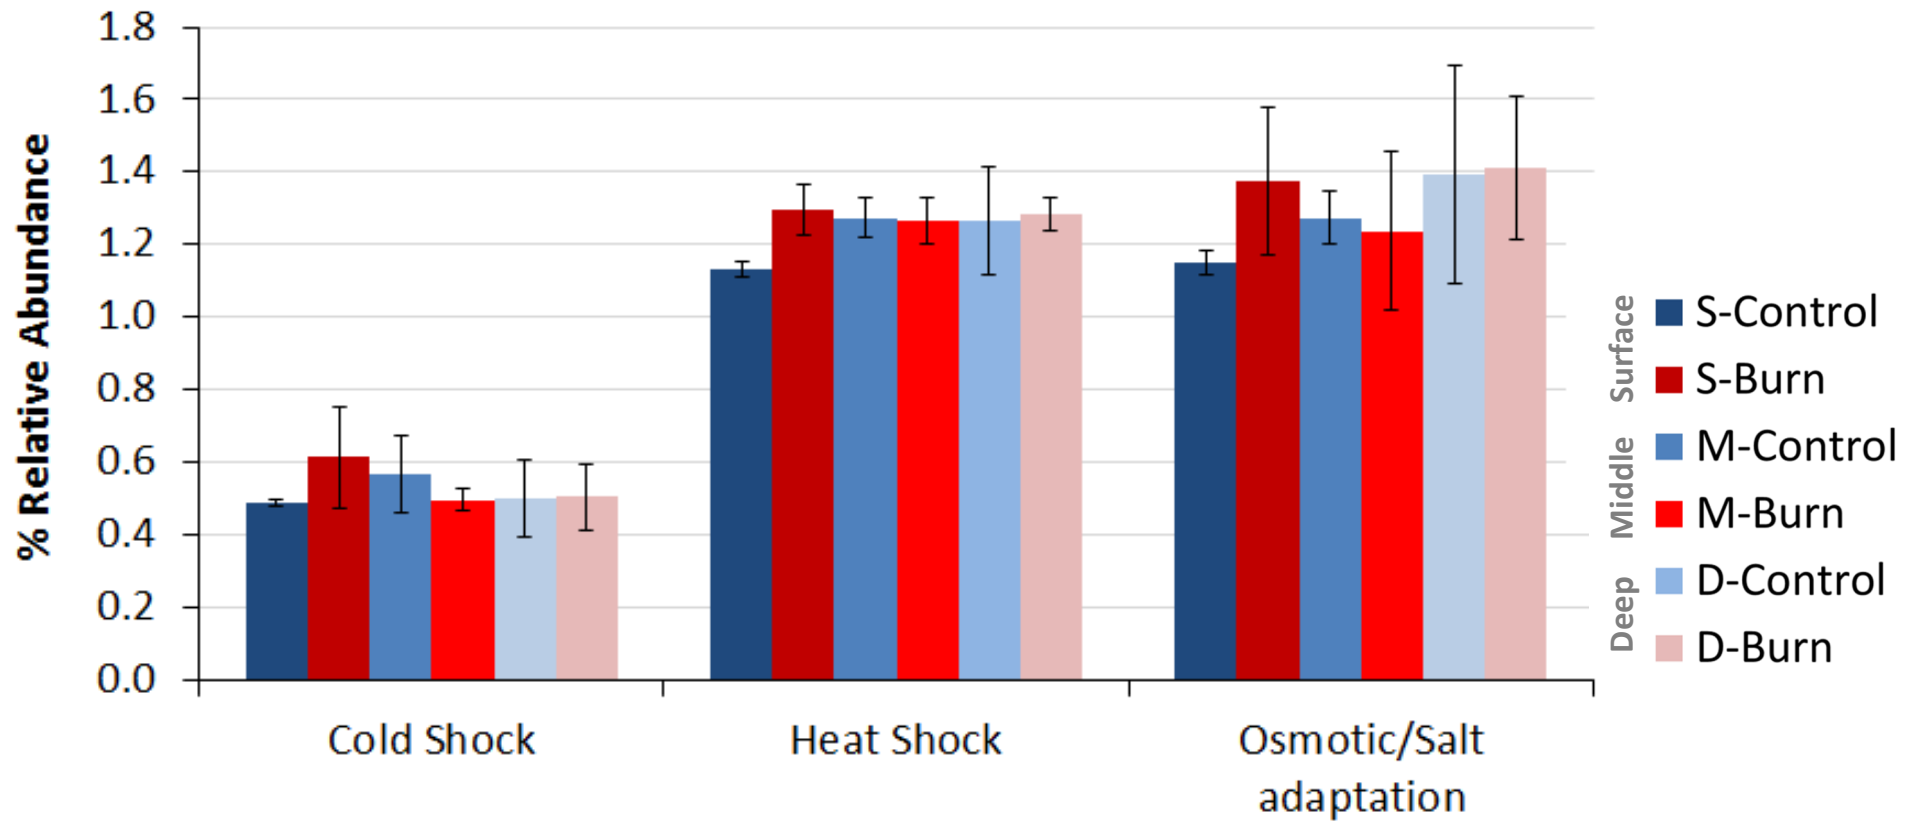

Supplement: ismej201436x1.pdf [file ismej201436x1.pdf]
