# Supplementary material for: Impact of fire on active layer and permafrost microbial communities and metagenomes in an upland Alaskan boreal forest
Source: PubMed Central journal article supplement — ISME J. 2014 Apr 10;8(9):1904–19. doi: 10.1038/ismej.2014.36 (PMC4139727; doi:10.1038/ismej.2014.36), 2014-04-10
Supplement: ismej201436x2.pdf [file ismej201436x2.pdf]

TableS1. Enzymes

| <b>Enzyme</b>                   | <b>Acronym</b> | <b>General function</b>                                                                                                   | <b>Substrate</b>                                                         | <b>EC no.</b>     |
|---------------------------------|----------------|---------------------------------------------------------------------------------------------------------------------------|--------------------------------------------------------------------------|-------------------|
| $\alpha$ -Glucosidase           | AG             | Hydrolysis of $\alpha$ -glucosyl residues, releases $\alpha$ -D-glucose                                                   | 4-Methylumbelliferyl $\alpha$ -D-glucopyranoside                         | 3.2.1.20          |
| $\beta$ -Glucosidase            | BG             | Hydrolysis of $\beta$ -glucosyl residues, releases $\beta$ -D-glucose; involved in the final step of cellulose hydrolysis | 4-Methylumbelliferyl $\beta$ -D-glucopyranoside                          | 3.2.1.21          |
| 1,4- $\beta$ -cellobiosidase    | CBH            | Hydrolysis of cellulose                                                                                                   | 4-Methylumbelliferyl $\beta$ -D-cellobiopyranoside                       | 3.2.1.91          |
| $\beta$ -N-acetylhexosaminidase | NAG            | Hydrolysis of glycosidic bonds in chitin                                                                                  | 4-Methylumbelliferyl N-acetyl- $\beta$ -D-glucosaminide                  | 3.2.1.52          |
| $\beta$ -Xylanase               | XYL            | Hydrolysis of hemicellulose                                                                                               | 4-Methylumbelliferyl $\beta$ -D-xylopyranoside                           | 3.2.1.37          |
| Phosphomonoesterase             | P              | Release of inorganic phosphate from simple phosphomonoesters, including organic and condensed inorganic phosphates        | 4-Methylumbelliferyl phosphate                                           | 3.1.3.2<br>(acid) |
| L-Alanine                       | ALA            | Peptidase                                                                                                                 | L-Alanine 7-amido-4-methylcoumarin trifluoroacetate                      | 3.5.1.28          |
| L-Leucine                       | LEU            | Peptidase                                                                                                                 | L-Leucine-7-amido-4-methylcoumarin hydrochloride                         | 3.4.11.1          |
| Phenol oxidase                  | PO             | Lignin                                                                                                                    | l-dihydroxyphenylalanine (l-DOPA)                                        | 1.10.3.2          |
| Peroxidase                      | POX            | Lignin                                                                                                                    | l-dihydroxyphenylalanine (l-DOPA) and 0.3% H <sub>2</sub> O <sub>2</sub> | 1.11.1.7          |

TableS2. Changes in the extracellular enzyme activities between control and burned locations (nmol/gr soil C /hr). Values represent the averages between the sampling locations with standard deviations; AG,  $\alpha$ -glucosidase, BG,  $\beta$ -glucosidase; CBH, $\beta$ -cellobiohydrolase; XYL,  $\beta$ -xylosidase; NAG, N-acetyl glucosaminidase; P, phosphatase; LEU, leucine; ALA, alanine; ns, Not significant.

**Control-15°C**

| <i>Depth (cm)</i> | <i>AG</i>   | <i>BG</i>    | <i>CBH</i>  | <i>XYL</i>   | <i>NAG</i>    | <i>P</i>       | <i>LEU</i> | <i>ALA</i> |
|-------------------|-------------|--------------|-------------|--------------|---------------|----------------|------------|------------|
| 0-10              | 7.3 ± 5.8   | 55.2 ± 23.4  | 13.3 ± 1.7  | 8.9 ± 2.7    | 50.0 ± 31.1   | 1725.5 ± 776.1 | 1.9 ± 1.8  | 1.9 ± 1.7  |
| 10-20             | 12.9 ± 7.8  | 112.5 ± 49.4 | 36.6 ± 13.0 | 29.6 ± 5.4   | 56.0 ± 8.2    | 1612.5 ± 915.0 | 2.3 ± 0.5  | 3.1 ± 1.7  |
| 20-30             | 5.2 ± 5.5   | 38.4 ± 22.2  | 16.0 ± 3.2  | 17.9 ± 5.7   | 32.9 ± 33.8   | 550.9 ± 376.8  | 0.5 ± 0.8  | 0.6 ± 0.6  |
| 30-40             | 7.3 ± 6.9   | 52.9 ± 33.8  | 17.3 ± 14.1 | 17.3 ± 6.2   | 20.4 ± 18.7   | 314.5 ± 99.2   | 2.6 ± 2.0  | 3.7 ± 4.0  |
| 40-50             | 4.7 ± 2.1   | 38.3 ± 6.4   | 7.5 ± 3.0   | 8.6 ± 2.8    | 22.7 ± 6.2    | 283.6 ± 45.5   | 1.1 ± 1.0  | 1.5 ± 1.5  |
| 50-60             | 29.8 ± 15.5 | 45.4 ± 3.5   | 37.7 ± 15.2 | 24.4 ± 5.0   | 45.1 ± 14.1   | 318.5 ± 152.4  | 2.6 ± 4.3  | 5.1 ± 8.7  |
| 60-70             | 29.4 ± 30.4 | 52.3 ± 33.5  | 36.3 ± 41.3 | 28.9 ± 34.8  | 51.3 ± 33.8   | 267.3 ± 124.5  | 1.8 ± 2.9  | 2.3 ± 3.6  |
| 70-80             | 78.9 ± 53.8 | 97.0 ± 52.1  | 98.3 ± 67.7 | 104.3 ± 71.2 | 173.6 ± 103.8 | 980.9 ± 438.7  | 6.8 ± 3.7  | 6.9 ± 2.7  |
| 80-90             | 20.5 ± 16.2 | 29.3 ± 14.8  | 12.4 ± 9.5  | 6.8 ± 9.2    | 38.6 ± 4.5    | 842.9 ± 795.1  | 0.9 ± 1.2  | 3.6 ± 5.6  |
| 90-100            | 27.5 ± 36.8 | 38.8 ± 17.5  | 28.0 ± 21.0 | 31.6 ± 30.5  | 69.0 ± 33.7   | 668.5 ± 686.5  | 2.4 ± 4.1  | 2.2 ± 2.6  |

**Control-4°C**

| <i>Depth (cm)</i> | <i>AG</i>   | <i>BG</i>   | <i>CBH</i>  | <i>XYL</i>  | <i>NAG</i>  | <i>P</i>       | <i>LEU</i> | <i>ALA</i> |
|-------------------|-------------|-------------|-------------|-------------|-------------|----------------|------------|------------|
| 0-10              | 9.2 ± 8.6   | 32.9 ± 17.2 | 18.3 ± 20.3 | 8.2 ± 6.9   | 41.0 ± 43.0 | 1240.3 ± 645.8 | 1.7 ± 1.5  | 2.0 ± 1.3  |
| 10-20             | 3.8 ± 6.5   | 66.7 ± 17.1 | 13.2 ± 10.7 | 12.5 ± 3.3  | 39.6 ± 11.8 | 1378.2 ± 421.4 | 0.8 ± 1.4  | 1.8 ± 3.1  |
| 20-30             | 1.5 ± 2.1   | 34.6 ± 33.4 | 3.8 ± 5.5   | 5.1 ± 4.2   | 10.0 ± 7.1  | 609.7 ± 617.9  | 0.5 ± 0.6  | 0.5 ± 0.5  |
| 30-40             | 9.0 ± 9.3   | 37.8 ± 25.5 | 15.4 ± 11.2 | 12.9 ± 4.3  | 16.6 ± 8.5  | 229.5 ± 98.1   | 2.0 ± 2.0  | 2.9 ± 3.8  |
| 40-50             | 7.4 ± 1.1   | 23.1 ± 6.6  | 8.4 ± 3.5   | 9.9 ± 4.4   | 16.5 ± 4.5  | 210.5 ± 27.2   | 1.0 ± 1.0  | 1.3 ± 1.4  |
| 50-60             | 12.1 ± 20.9 | 15.2 ± 26.3 | 11.5 ± 19.9 | 12.5 ± 21.6 | 19.3 ± 33.5 | 341.0 ± 167.7  | 2.6 ± 2.8  | 4.9 ± 7.1  |
| 60-70             | 20.7 ± 26.7 | 27.9 ± 18.9 | 25.6 ± 27.3 | 24.5 ± 31.2 | 37.4 ± 35.7 | 232.9 ± 104.9  | 2.1 ± 2.4  | 2.6 ± 3.0  |
| 70-80             | 21.1 ± 0.0  | 22.4 ± 19.2 | 15.5 ± 18.9 | 20.1 ± 21.0 | 49.1 ± 48.4 | 1118.7 ± 987.1 | 9.4 ± 8.5  | 8.4 ± 7.1  |
| 80-90             | 0.0 ± 0.0   | 6.7 ± 6.7   | 2.2 ± 3.8   | 22.1 ± 35.1 | 25.3 ± 22.8 | 811.7 ± 718.4  | 0.1 ± 0.2  | 2.7 ± 4.2  |
| 90-100            | 30.2 ± 51.0 | 35.0 ± 53.6 | 41.1 ± 69.9 | 23.6 ± 40.9 | 38.3 ± 50.4 | 616.5 ± 620.0  | 2.0 ± 3.4  | 3.4 ± 3.1  |

**Burn-15°C**

| <i>Depth (cm)</i> | <i>AG</i> |   | <i>BG</i> |       | <i>CBH</i> |      | <i>XYL</i> |   | <i>NAG</i> |       | <i>P</i> | <i>LEU</i> |       | <i>ALA</i> |       |        |   |       |     |   |     |     |   |     |
|-------------------|-----------|---|-----------|-------|------------|------|------------|---|------------|-------|----------|------------|-------|------------|-------|--------|---|-------|-----|---|-----|-----|---|-----|
| 0-10              | 9.6       | ± | 47.9      | 160.2 | ±          | 62.1 | 60.8       | ± | 58.9       | 48.1  | ±        | 57.0       | 68.8  | ±          | 79.2  | 3482.9 | ± | 697.3 | 3.1 | ± | 1.6 | 4.6 | ± | 4.4 |
| 10-20             | 22.5      | ± | 6.5       | 198.2 | ±          | 19.5 | 75.2       | ± | 18.3       | 106.7 | ±        | 9.9        | 97.1  | ±          | 14.1  | 3930.3 | ± | 212.9 | 9.7 | ± | 0.5 | 9.8 | ± | 0.5 |
| 20-30             | 22.7      | ± | 37.6      | 129.6 | ±          | 39.3 | 36.2       | ± | 58.5       | 35.2  | ±        | 43.6       | 67.1  | ±          | 45.2  | 1187.9 | ± | 126.6 | 3.4 | ± | 0.4 | 6.7 | ± | 0.1 |
| 30-40             | 6.0       | ± | 3.1       | 52.2  | ±          | 40.3 | 37.9       | ± | 10.6       | 34.9  | ±        | 3.2        | 42.9  | ±          | 5.0   | 416.3  | ± | 335.3 | 0.0 | ± | 0.8 | 0.4 | ± | 3.7 |
| 40-50             | 105.3     | ± | 0.3       | 155.5 | ±          | 9.3  | 134.0      | ± | 1.6        | 120.7 | ±        | 0.9        | 152.4 | ±          | 0.2   | 1378.0 | ± | 157.5 | 2.5 | ± | 0.4 | 6.4 | ± | 3.0 |
| 50-60             | 53.9      | ± | 33.1      | 121.3 | ±          | 52.7 | 91.8       | ± | 40.9       | 65.4  | ±        | 31.1       | 70.3  | ±          | 43.4  | 747.6  | ± | 681.1 | 0.7 | ± | 2.6 | 0.3 | ± | 2.4 |
| 60-70             | 12.0      | ± | 6.3       | 64.7  | ±          | 7.5  | 27.4       | ± | 35.5       | 15.5  | ±        | 9.9        | 22.8  | ±          | 31.4  | 632.6  | ± | 159.5 | 1.3 | ± | 1.4 | 3.2 | ± | 0.6 |
| 70-80             | 38.0      | ± | 28.5      | 60.3  | ±          | 49.5 | 51.1       | ± | 16.1       | 34.0  | ±        | 23.8       | 49.7  | ±          | 7.2   | 654.3  | ± | 499.4 | 3.2 | ± | 3.4 | 3.3 | ± | 0.4 |
| 80-90             | 32.4      | ± | 360.1     | 52.0  | ±          | 44.6 | 18.4       | ± | 73.1       | 25.1  | ±        | 63.6       | 30.9  | ±          | 124.3 | 557.3  | ± | 586.1 | 4.5 | ± | 8.5 | 3.9 | ± | 4.6 |
| 90-100            | 282.9     | ± | 337.6     | 43.0  | ±          | 52.4 | 59.4       | ± | 72.3       | 52.8  | ±        | 64.2       | 115.7 | ±          | 121.5 | 4732.7 | ± | 531.7 | 9.1 | ± | 9.1 | 9.3 | ± | 9.6 |

**Burn-4°C**

| <i>Depth (cm)</i> | <i>AG</i> |   | <i>BG</i> |       | <i>CBH</i> |      | <i>XYL</i> |   | <i>NAG</i> |      | <i>P</i> | <i>LEU</i> |       | <i>ALA</i> |      |        |   |       |     |   |     |     |   |     |
|-------------------|-----------|---|-----------|-------|------------|------|------------|---|------------|------|----------|------------|-------|------------|------|--------|---|-------|-----|---|-----|-----|---|-----|
| 0-10              | 42.9      | ± | 27.2      | 160.8 | ±          | 98.5 | 88.7       | ± | 54.5       | 84.5 | ±        | 51.8       | 101.2 | ±          | 62.6 | 2180.6 | ± | 932.1 | 3.2 | ± | 2.1 | 4.7 | ± | 3.0 |
| 10-20             | 40.2      | ± | 23.7      | 140.9 | ±          | 80.8 | 70.4       | ± | 40.9       | 94.7 | ±        | 54.4       | 96.7  | ±          | 56.7 | 2626.6 | ± | 916.5 | 9.4 | ± | 6.6 | 9.3 | ± | 4.4 |
| 20-30             | 42.0      | ± | 19.0      | 110.7 | ±          | 52.9 | 76.9       | ± | 34.0       | 77.3 | ±        | 34.7       | 97.0  | ±          | 39.2 | 1076.4 | ± | 440.1 | 6.7 | ± | 0.6 | 7.4 | ± | 0.6 |
| 30-40             | 1.2       | ± | 1.7       | 32.7  | ±          | 10.4 | 15.3       | ± | 0.7        | 16.4 | ±        | 0.6        | 32.2  | ±          | 7.6  | 538.3  | ± | 22.9  | 2.6 | ± | 1.2 | 3.3 | ± | 1.5 |
| 40-50             | 34.9      | ± | 34.1      | 76.3  | ±          | 75.6 | 63.8       | ± | 58.4       | 41.2 | ±        | 38.4       | 34.1  | ±          | 34.2 | 1224.6 | ± | 330.7 | 2.2 | ± | 2.7 | 6.3 | ± | 8.7 |
| 50-60             | 11.6      | ± | 0.9       | 47.8  | ±          | 10.2 | 18.2       | ± | 1.5        | 26.4 | ±        | 2.1        | 32.2  | ±          | 4.0  | 777.4  | ± | 487.2 | 0.0 | ± | 0.0 | 0.0 | ± | 0.0 |
| 60-70             | 2.0       | ± | 2.9       | 2.9   | ±          | 4.2  | 2.3        | ± | 3.2        | 2.1  | ±        | 3.0        | 4.1   | ±          | 5.7  | 546.9  | ± | 295.8 | 0.4 | ± | 0.6 | 1.5 | ± | 2.1 |
| 70-80             | 15.2      | ± | 21.5      | 14.9  | ±          | 21.0 | 7.4        | ± | 10.4       | 20.8 | ±        | 22.2       | 26.1  | ±          | 25.8 | 613.1  | ± | 648.0 | 0.2 | ± | 0.4 | 0.3 | ± | 0.2 |
| 80-90             | 4.2       | ± | 6.0       | 7.6   | ±          | 10.8 | 4.3        | ± | 6.1        | 16.7 | ±        | 8.1        | 32.4  | ±          | 13.3 | 446.2  | ± | 406.3 | 4.6 | ± | 4.6 | 3.8 | ± | 2.1 |
| 90-100            | 60.4      | ± | 67.3      | 19.2  | ±          | 9.2  | 84.6       | ± | 92.0       | 44.4 | ±        | 54.1       | 51.9  | ±          | 37.7 | 4518.8 | ± | 510.3 | 0.0 | ± | 0.0 | 0.4 | ± | 0.5 |

**p values of Tukey's HSD analysis comparing Control vs Burn**

| Soil layer        | AG | BG    | CBH   | XYL   | NAG   | P     | ALA   | LEU   |
|-------------------|----|-------|-------|-------|-------|-------|-------|-------|
| Surface           | ns | 0.001 | 0.021 | 0.001 | ns    | ns    | 0.002 | 0.005 |
| Middle            | ns | ns    | ns    | ns    | ns    | ns    | ns    | ns    |
| Permafrost        | ns | ns    | ns    | ns    | ns    | ns    | ns    | ns    |
| Surface (mineral) | ns | 0.001 | 0.016 | 0.001 | 0.015 | 0.002 | 0.026 | 0.017 |

TableS3. Overview of the Nome Creek metagenome sequencing and annotation

| <b>Sample Name</b>            | <b># reads<br/>(101bp) per<br/>sample</b> | <b># of reads<br/>quality<br/>checks (bp)</b> | <b>Average<br/>Length after<br/>quality<br/>checks (bp)</b> | <b>Average<br/>GC<br/>content</b> | <b># of genes<br/>with KO<br/>annotation*</b> | <b>% reads<br/>assembled<br/>to contigs</b> | <b># of<br/>contigs</b> | <b>Average<br/>contig<br/>length<br/>(bp)</b> |
|-------------------------------|-------------------------------------------|-----------------------------------------------|-------------------------------------------------------------|-----------------------------------|-----------------------------------------------|---------------------------------------------|-------------------------|-----------------------------------------------|
| Active Layer-Burn-01          | 5.8E+07                                   | 5.7E+07                                       | 93.9                                                        | 61.77                             | 424,830                                       | 36.3%                                       | 488,007                 | 436                                           |
| Active Layer-Burn-02          | 3.5E+07                                   | 3.5E+07                                       | 91.7                                                        | 60.29                             | 179,523                                       | 20.4%                                       | 230,496                 | 396                                           |
| Active Layer-Control-01       | 6.6E+07                                   | 6.5E+07                                       | 90.6                                                        | 60.45                             | 349,466                                       | 29.6%                                       | 525,293                 | 433                                           |
| Active Layer-Control-02       | 6.6E+07                                   | 6.6E+07                                       | 92.7                                                        | 59.95                             | 376,504                                       | 23.5%                                       | 551,635                 | 404                                           |
| Intermediate Layer-Burn-01    | 7.0E+07                                   | 6.9E+07                                       | 93.4                                                        | 63.20                             | 498,216                                       | 50.0%                                       | 548,719                 | 480                                           |
| Intermediate Layer-Burn-02    | 9.0E+07                                   | 8.9E+07                                       | 91.9                                                        | 60.50                             | 527,132                                       | 44.6%                                       | 683,306                 | 466                                           |
| Intermediate Layer-Control-01 | 7.1E+07                                   | 7.0E+07                                       | 90.3                                                        | 60.95                             | 465,853                                       | 53.1%                                       | 602,260                 | 479                                           |
| Intermediate Layer-Control-02 | 6.6E+07                                   | 6.5E+07                                       | 92.7                                                        | 61.64                             | 474,106                                       | 47.8%                                       | 562,022                 | 453                                           |
| Permafrost Layer-Burn-01      | 6.4E+07                                   | 6.3E+07                                       | 93.3                                                        | 63.05                             | 474,062                                       | 62.6%                                       | 576,274                 | 503                                           |
| Permafrost Layer-Burn-02      | 7.7E+07                                   | 7.6E+07                                       | 92.3                                                        | 62.30                             | 516,012                                       | 40.8%                                       | 558,899                 | 457                                           |
| Permafrost Layer-Control-01   | 6.6E+07                                   | 6.4E+07                                       | 90.4                                                        | 61.00                             | 436,175                                       | 50.0%                                       | 373,132                 | 483                                           |
| Permafrost Layer-Control-02   | 6.1E+07                                   | 6.0E+07                                       | 92.1                                                        | 62.60                             | 467,116                                       | 59.4%                                       | 400,325                 | 500                                           |

\* for selected genes in the database

Table.S4 Pearson correlation coefficients of soil geochemical parameters and potential total enzyme activity to changes in the relative abundance of different phylogenetic groups in the Nome Creek samples. Significant correlations are highlighted as bold.

|                     | pH            | p            | Water         | p            | C             | p            | N             | p            | Total enzyme activity | p            |
|---------------------|---------------|--------------|---------------|--------------|---------------|--------------|---------------|--------------|-----------------------|--------------|
| Acidobacteria       | -0.030        | 0.900        | -0.153        | 0.518        | -0.101        | 0.669        | 0.071         | 0.765        | -0.219                | 0.353        |
| Actinobacteria      | -0.173        | 0.465        | <b>0.421</b>  | <b>0.063</b> | 0.338         | 0.144        | <b>0.445</b>  | <b>0.049</b> | 0.143                 | 0.545        |
| AD3                 | <b>0.512</b>  | <b>0.021</b> | <b>-0.746</b> | <b>0.000</b> | <b>-0.661</b> | <b>0.001</b> | <b>-0.690</b> | <b>0.001</b> | <b>-0.450</b>         | <b>0.046</b> |
| Archaea             | -0.044        | 0.852        | 0.370         | 0.107        | 0.058         | 0.807        | -0.082        | 0.731        | 0.116                 | 0.623        |
| Euryarchaeota       | -0.026        | 0.910        | 0.298         | 0.200        | -0.035        | 0.883        | -0.076        | 0.748        | -0.047                | 0.843        |
| Bacteroidetes       | <b>-0.455</b> | <b>0.043</b> | <b>0.742</b>  | <b>0.000</b> | <b>0.500</b>  | <b>0.025</b> | 0.349         | 0.130        | <b>0.456</b>          | <b>0.043</b> |
| Chloroflexi         | 0.169         | 0.474        | 0.156         | 0.511        | -0.101        | 0.669        | -0.324        | 0.163        | 0.076                 | 0.747        |
| Firmicutes          | 0.121         | 0.608        | 0.160         | 0.500        | -0.158        | 0.504        | -0.311        | 0.182        | -0.042                | 0.857        |
| Gemmatimonadetes    | <b>0.517</b>  | <b>0.019</b> | <b>-0.610</b> | <b>0.004</b> | <b>-0.548</b> | <b>0.012</b> | <b>-0.656</b> | <b>0.002</b> | -0.326                | 0.160        |
| Proteobacteria      | <b>-0.601</b> | <b>0.005</b> | <b>0.511</b>  | <b>0.021</b> | <b>0.748</b>  | <b>0.000</b> | <b>0.804</b>  | <b>0.000</b> | <b>0.543</b>          | <b>0.013</b> |
| Alphaproteobacteria | -0.358        | 0.120        | 0.179         | 0.448        | 0.321         | 0.167        | <b>0.599</b>  | <b>0.005</b> | 0.040                 | 0.864        |
| Betaproteobacteria  | <b>0.490</b>  | <b>0.028</b> | -0.225        | 0.340        | <b>-0.401</b> | <b>0.079</b> | <b>-0.553</b> | <b>0.011</b> | -0.195                | 0.408        |
| Gammaproteobacteria | <b>-0.579</b> | <b>0.007</b> | <b>0.482</b>  | <b>0.031</b> | <b>0.652</b>  | <b>0.001</b> | <b>0.736</b>  | <b>0.000</b> | <b>0.442</b>          | <b>0.050</b> |
| Verrucomicrobia     | <b>-0.472</b> | <b>0.035</b> | 0.355         | 0.123        | <b>0.563</b>  | <b>0.010</b> | <b>0.671</b>  | <b>0.001</b> | 0.332                 | 0.152        |
